# Supplementary material for: Unusual coordination mode of tetradentate Schiff base cobalt(iii) complexes
Source: Royal Society of Chemistry journal article supplement (doi:10.1039/c2dt11871h), 2011-12-13
Supplement: c2dt11871h.pdf [file c2dt11871h.pdf]

## Unusual coordination mode of tetradentate Schiff base cobalt(III) complexes

Anish Cyriac,<sup>a</sup> Jong Yeob Jeon,<sup>a</sup> Jobi Kodyan Varghese,<sup>a</sup> Ji Hae Park,<sup>a</sup> Soo Young Choi,<sup>b</sup> Young Keun Chung,<sup>b</sup> and Bun Yeoul Lee\*<sup>a</sup>

<sup>a</sup>Department of Molecular Science and Technology, Ajou University, Suwon, 443-749, South Korea;

<sup>b</sup>Department of Chemistry, Seoul National University, Silimdong Gwanak-gu, Seoul 151-747 Korea

### Supporting Information

**General Remarks.** CH<sub>2</sub>Cl<sub>2</sub>, CD<sub>2</sub>Cl<sub>2</sub> and CDCl<sub>3</sub> were dried by stirring over CaH<sub>2</sub>, and they were subsequently vacuum-transferred to reservoirs. THF-d<sub>8</sub> was dried over KH and filtered. The dmsO-d<sub>6</sub> was dried over molecular sieves 3A. The <sup>1</sup>H NMR (400 MHz) and <sup>13</sup>C NMR (100 MHz) spectra were recorded on a Varian Mercury Plus 400. Elemental analyses were carried out at the Analytical Center, Kyunghee University.

**X-ray Crystallography.** Single crystal diffraction data were measured by an Bruker-Nonius CCD single-crystal X-ray diffractometer at room temperature (293K) using graphite-monochromated MoK $\alpha$  radiation ( $\lambda = 0.71073 \text{ \AA}$ ). Preliminary orientation matrices and unit cell parameters were obtained from the peaks of the first 10 frames and then refined using the whole data set. Frames were integrated and corrected for Lorentz and polarization effects using DENZO. The structure was solved by direct or patterson methods using SHELXS-97 and refined by full-matrix least-squares with SHELXL-97. All non-hydrogen atoms were refined anisotropically. Some of hydrogen atoms were found during refinement. Crystallographic parameters for (Me-salcy)Co(OAc) $\cdot$ 2(HOAc), (Me-salcy)Co( $\kappa^2$ -OAc), (Me-salcy)Co( $\kappa^2$ -NO<sub>3</sub>), (Me-salen)Co(OAc)(H<sub>2</sub>O) and (Me-sal-*cis*-cy)Co(II) are summarized in Table S1 and S2.

**Table S1.** Crystallographic parameters for (Me-salcy)Co(OAc)·2(HOAc), (Me-salcy)Co( $\kappa^2$ -OAc) and (Me-salcy)Co( $\kappa^2$ -NO<sub>3</sub>)

|                                    | (Me-salcy)Co(OAc)·2(HOAc)                                        | (Me-salcy) Co( $\kappa^2$ -OAc)                                                                   | (Me-salcy) Co( $\kappa^2$ -NO <sub>3</sub> )                     |
|------------------------------------|------------------------------------------------------------------|---------------------------------------------------------------------------------------------------|------------------------------------------------------------------|
| Formula                            | C <sub>30</sub> H <sub>39</sub> Co N <sub>2</sub> O <sub>8</sub> | C <sub>26</sub> H <sub>31</sub> Co N <sub>2</sub> O <sub>4</sub> ·CH <sub>2</sub> Cl <sub>2</sub> | C <sub>24</sub> H <sub>28</sub> Co N <sub>3</sub> O <sub>5</sub> |
| Fw                                 | 614.56                                                           | 579.38                                                                                            | 497.42                                                           |
| a, Å                               | 11.6690(6)                                                       | 11.0257(4)                                                                                        | 12.1174(9)                                                       |
| b, Å                               | 17.5399(13)                                                      | 12.2862(4)                                                                                        | 10.9880(8)                                                       |
| c, Å                               | 16.0611(11)                                                      | 12.3223(4)                                                                                        | 17.4499(11)                                                      |
| $\alpha$ , deg                     | 90                                                               | 82.506(2)                                                                                         | 90                                                               |
| $\beta$ , deg                      | 110.763(4)                                                       | 65.358(2)                                                                                         | 95.855(4)                                                        |
| $\gamma$ , deg                     | 90                                                               | 66.712(2)                                                                                         | 90                                                               |
| V, Å <sup>3</sup>                  | 3073.8(3)                                                        | 1392.42(8)                                                                                        | 2311.3(3)                                                        |
| Crystal system                     | Monoclinic                                                       | Triclinic                                                                                         | Monoclinic                                                       |
| Space group                        | P 2 <sub>1</sub> /c                                              | P -1                                                                                              | P 2 <sub>1</sub> /c                                              |
| D(calc),mg m <sup>-3</sup>         | 1.328                                                            | 1.382                                                                                             | 1.430                                                            |
| Z                                  | 4                                                                | 2                                                                                                 | 4                                                                |
| $\mu$ , mm <sup>-1</sup>           | 0.609                                                            | 0.843                                                                                             | 0.783                                                            |
| No. of data collected              | 9388                                                             | 9154                                                                                              | 9108                                                             |
| No. of unique data [R(int)]        | 5539(0.0335)                                                     | 6350 (0.0242)                                                                                     | 5274 (0.0762)                                                    |
| No. of variables                   | 381                                                              | 330                                                                                               | 302                                                              |
| Final R indices (I>2 $\sigma$ (I)) | R <sub>1</sub> = 0.0650, wR <sub>2</sub> = 0.1623                | R <sub>1</sub> = 0.0575, wR <sub>2</sub> = 0.1499                                                 | R <sub>1</sub> = 0.0606, wR <sub>2</sub> = 0.0977                |
| R indices (all data)               | R <sub>1</sub> = 0.0957, wR <sub>2</sub> = 0.1813                | R <sub>1</sub> = 0.0796, wR <sub>2</sub> = 0.1651                                                 | R <sub>1</sub> = 0.1566, wR <sub>2</sub> = 0.1216                |
| Goodness of fit                    | 1.038                                                            | 1.029                                                                                             | 0.966                                                            |

**Table S2.** Crystallographic parameters for (Me-salen)Co(OAc)(H<sub>2</sub>O) and (Me-sal-*cis*-cy)Co(II)

|                                    | (Me-salen)Co(OAc)(H <sub>2</sub> O)                                                               | (Me-sal- <i>cis</i> -cy)Co(II)                                   |
|------------------------------------|---------------------------------------------------------------------------------------------------|------------------------------------------------------------------|
| Formula                            | C <sub>45</sub> H <sub>59</sub> Cl <sub>2</sub> Co <sub>2</sub> N <sub>4</sub> O <sub>11.50</sub> | C <sub>24</sub> H <sub>28</sub> Co N <sub>2</sub> O <sub>2</sub> |
| Fw                                 | 1028.72                                                                                           | 435.41                                                           |
| a, Å                               | 11.9561(9)                                                                                        | 13.5058(4)                                                       |
| b, Å                               | 15.1436(11)                                                                                       | 8.7766(4)                                                        |
| c, Å                               | 15.2435(8)                                                                                        | 18.0814(7)                                                       |
| $\alpha$ , deg                     | 92.675(4)                                                                                         | 90                                                               |
| $\beta$ , deg                      | 92.569(4)                                                                                         | 96.924(2)                                                        |
| $\gamma$ , deg                     | 110.492(3)                                                                                        | 90                                                               |
| V, Å <sup>3</sup>                  | 2577.0(3)                                                                                         | 2127.65(14)                                                      |
| Crystal system                     | Triclinic                                                                                         | Monoclinic                                                       |
| Space group                        | P -1                                                                                              | P 2 <sub>1</sub> /n                                              |
| D(calc),mg m <sup>-3</sup>         | 1.326                                                                                             | 1.359                                                            |
| Z                                  | 2                                                                                                 | 4                                                                |
| $\mu$ , mm <sup>-1</sup>           | 0.805                                                                                             | 0.829                                                            |
| No. of data collected              | 15632                                                                                             | 7867                                                             |
| No. of unique data [R(int)]        | 10799 (0.0997)                                                                                    | 4861 (0.0265)                                                    |
| No. of variables                   | 605                                                                                               | 266                                                              |
| Final R indices (I>2 $\sigma$ (I)) | R <sub>1</sub> = 0.1130, wR <sub>2</sub> = 0.2840                                                 | R <sub>1</sub> = 0.0391, wR <sub>2</sub> = 0.0872                |
| R indices (all data)               | R <sub>1</sub> = 0.2889, wR <sub>2</sub> = 0.3760                                                 | R <sub>1</sub> = 0.0618, wR <sub>2</sub> = 0.0956                |
| Goodness of fit                    | 1.015                                                                                             | 1.030                                                            |

**(Me-salen)(H)<sub>2</sub>**. 3,5-Dimethyl-2-hydroxybenzaldehyde was prepared according to the reported method.<sup>[1]</sup> 3,5-Dimethyl-2-hydroxybenzaldehyde (1.00 g, 6.66 mmol) was weighed into a 50 mL round bottom flask inside a glove box, and then ethylenediamine (200 mg, 3.33 mmol) and methylene chloride (10 mL) were added. The reaction mixture was stirred overnight at room temperature. The solution was filtered through Celite and solvent was removed under reduced pressure. Yellow solid was obtained in quantitative yield which was pure enough to use without further purification. IR (KBr): 3453 (OH), 1632 (C=N) cm<sup>-1</sup>. <sup>1</sup>H NMR (CDCl<sub>3</sub>): δ 13.23 (br, s, 2H, OH), 8.29 (s, 2H, N=CH), 7.01 (s, 2H), 7.87 (s, 2H), 3.92 (s, 4H, N-CH<sub>2</sub>), 2.27 (s, 12H, CH<sub>3</sub>) ppm. <sup>13</sup>C{<sup>1</sup>H} NMR (CDCl<sub>3</sub>): δ 166.45, 156.87, 134.31, 129.06, 127.02, 125.44, 117.51, 59.96 (N-CH), 20.52, 15.69 ppm. Anal. Calc. (C<sub>20</sub>H<sub>24</sub>N<sub>2</sub>O<sub>2</sub>): C, 74.04; H, 7.46; N, 8.64 %. Found: C, 74.16; H, 7.50; N, 8.73 %.

**(Me-sal-cis-cy)(H)<sub>2</sub>**. This compound was prepared by the same procedure as that of (Me-salen)(H)<sub>2</sub>, using *cis*-1,2-diaminocyclohexane instead of ethylenediamine. Yellow solid was obtained in quantitative yield which was pure enough to use without further purification. IR (KBr): 3475 (OH), 1637 (C=N) cm<sup>-1</sup>. <sup>1</sup>H NMR (CDCl<sub>3</sub>): δ 13.42 (s, 2H, OH), 8.28 (s, 2H, N=CH), 6.99 (s, 2H), 6.88 (s, 2H), 3.58 (m, 2H, N-CH), 2.26 (s, 6H, CH<sub>3</sub>), 2.23 (s, 6H, CH<sub>3</sub>), 1.93 (br, 4H, CH<sub>2</sub>), 1.76 (m, 2H, CH<sub>2</sub>) 1.59 (m, 2H, CH<sub>2</sub>) ppm. <sup>13</sup>C{<sup>1</sup>H} NMR (CDCl<sub>3</sub>): δ 164.14, 157.12, 134.16, 129.09, 126.83, 125.49, 117.76, 69.70, 30.86, 22.84, 20.55, 15.72 ppm. Anal. Calc. (C<sub>24</sub>H<sub>30</sub>N<sub>2</sub>O<sub>2</sub>): C, 76.16; H, 7.99; N, 7.40 %. Found: C, 75.85; H, 7.97; N, 7.49 %.

**(Me-salcy)Co(OAc)·2(HOAc)**. (Me-salcy)(H)<sub>2</sub> was prepared according to the reported method.<sup>[2]</sup> To a flask containing (Me-salcy)(H)<sub>2</sub> (830 mg, 2.19 mmol) and Co(OAc)<sub>2</sub> (388 mg, 2.19 mmol), methylene chloride (8 mL) was added. After stirring for 20 min, glacial acetic acid (660 mg, 11.0 mmol) in methylene chloride (2 mL) was added and the resulting solution was stirred under O<sub>2</sub> atmosphere for 12 hours. Solvent was removed by vacuum. After dissolving the residue in methylene chloride again, pentane was layered to diffuse slowly. Crystals were deposited in 2 days. <sup>1</sup>H NMR (CD<sub>2</sub>Cl<sub>2</sub>): δ 13.01 (br, 2H, OH), 7.45 (s, 2H, N=CH), 7.16 (s, 2H), 7.10 (s, 2H), 4.01 (br, 2H, N-CH), 2.93 (br, 2H, CH<sub>2</sub>), 2.62 (s, 6H, CH<sub>3</sub>), 2.43 (s, 6H,

CH<sub>3</sub>), 2.07 (br, 2H, CH<sub>2</sub>), 1.99 (br, 2H, CH<sub>2</sub>), 1.77 (s, 9H, acetate-CH<sub>3</sub>), 1.61 (br, 2H, CH<sub>2</sub>) ppm. <sup>13</sup>C{<sup>1</sup>H} NMR (CD<sub>2</sub>Cl<sub>2</sub>): δ 180.32 (CO), 163.29, 158.33, 136.45, 131.92, 131.19, 125.93, 119.71, 70.90 (N-CH), 30.14 (CH<sub>2</sub>), 25.07 (CH<sub>2</sub>), 22.41 (acetate-CH<sub>3</sub>), 20.03 (CH<sub>3</sub>), 17.01 (CH<sub>3</sub>). Anal. Calc. (C<sub>30</sub>H<sub>39</sub>CoN<sub>2</sub>O<sub>8</sub>): C, 58.63; H, 6.40; N, 4.56 %. Found: C, 58.39; H, 6.34; N, 4.33 %.

**(Me-salcy)Co(κ<sup>2</sup>-OAc).** Two more successive crystallization of (Me-salcy)Co(OAc)·2(HOAc) gave the crystals of (Me-salcy)Co(κ<sup>2</sup>-OAc). When (Me-salcy)Co(OAc)·2(HOAc) was triturated in diethyl ether for several hours, (Me-salcy)Co(κ<sup>2</sup>-OAc) was isolated as powder. <sup>1</sup>H NMR (CD<sub>2</sub>Cl<sub>2</sub>): δ 7.43 (s, 1H, N=CH), 7.29 (s, 1H, N=CH), 7.12 (s, 1H), 7.02 (s, 1H), 6.90 (s, 1H), 6.80 (s, 1H), 4.23 (br, 1H, N-CH), 3.16 (br, 1H, N-CH), 2.72 (br, 2H, CH<sub>2</sub>), 2.50 (s, 3H, CH<sub>3</sub>), 2.29 (br, s, 3H, CH<sub>3</sub>), 2.25 (br, s, 3H, CH<sub>3</sub>), 1.99 (br, 5H, CH<sub>3</sub> and CH<sub>2</sub>), 1.68 (s, 3H, acetate-CH<sub>3</sub>), 1.58 (br, 4H, CH<sub>2</sub>) ppm. <sup>1</sup>H NMR (THF-d<sub>8</sub>): δ 7.54 (s, 1H, N=CH), 7.30 (s, 1H, N=CH), 6.99 (s, 1H), 6.94 (s, 1H), 6.74 (s, 1H), 6.70 (s, 1H), 4.10 (br, 1H, N-CH), 2.97 (br, 1H, N-CH), 2.74 (br, 1H, CH<sub>2</sub>), 2.67 (br, 1H, CH<sub>2</sub>), 2.44 (s, 3H, CH<sub>3</sub>), 2.19 (s, 3H, CH<sub>3</sub>), 2.16 (s, 3H, CH<sub>3</sub>), 1.97 (s, 3H, CH<sub>3</sub>), 1.93 (br, 2H, CH<sub>2</sub>), 1.85 (br, 2H, CH<sub>2</sub>), 1.53 (s, 3H, acetate-CH<sub>3</sub>), 1.44 (br, 2H, CH<sub>2</sub>) ppm. In dmsd-d<sub>6</sub>, two sets of signals were observed in 1:0.09 ratio. Data for the major set: δ 7.78 (s, 1H, N=CH), 7.74 (s, 1H, N=CH), 7.10 (s, 1H), 7.07 (s, 1H), 7.03 (s, 1H), 7.00 (s, 1H), 3.77 (br, 1H, N-CH), 3.53 (br, 1H, N-CH), 2.95 (br, 2H, CH<sub>2</sub>), 2.53 (s, 3H, CH<sub>3</sub>), 2.49 (s, 3H, CH<sub>3</sub>), 2.19 (s, 6H, CH<sub>3</sub>), 1.96 (br, 2H, CH<sub>2</sub>), 1.79 (br, 2H, CH<sub>2</sub>), 1.58 (s, 3H, acetate-CH<sub>3</sub>), 1.51 (br, 2H, CH<sub>2</sub>) ppm. Data for the minor set: δ 7.91 (s, 2H, N=CH), 7.22 (s, 2H), 7.14 (s, 2H), 3.56 (br, 2H, N-CH), 2.58 (s, 6H, CH<sub>3</sub>), 2.24 (s, 6H, CH<sub>3</sub>), 2.19 (s, 3H, acetate-CH<sub>3</sub>), 2.00-1.50 (br, 8H, CH<sub>2</sub>) ppm. Anal. Calc. (C<sub>26</sub>H<sub>31</sub>CoN<sub>2</sub>O<sub>4</sub>): C, 63.15; H, 6.32; N, 5.67 %. Found: C, 63.02; H, 6.28; N, 5.72 %.

**(Me-salen)Co(OAc)(H<sub>2</sub>O).** This complex can be prepared by the same procedure as that of (Me-salcy)Co(OAc)·2(HOAc) using (Me-salen)(H)<sub>2</sub>. Removal of solvent gave (Me-salcy)Co(OAc)·2(HOAc) (550 mg, 95%). Repeated recrystallization twice times by layer-diffusion in methylene chloride/pentane gave (Me-salen)Co(OAc)·(HOAc), of which composition was inferred from the integration value in the <sup>1</sup>H NMR

spectrum. Repeated recrystallization five times yielded (Me-salen)Co(OAc)(H<sub>2</sub>O), of which structure was proved by the X-ray crystallography. Data for (Me-salen)Co(OAc)·HOAc: <sup>1</sup>H NMR (CD<sub>2</sub>Cl<sub>2</sub>), δ 7.39 (s, 2H, N=CH), 7.11 (s, 2H), 7.05 (s, 2H), 4.38 (br, 4H, N-CH), 2.56 (s, 6H, CH<sub>3</sub>), 2.50 (s, 6H, CH<sub>3</sub>), 1.78 (s, 6H, acetate-CH<sub>3</sub>) ppm. <sup>13</sup>C{<sup>1</sup>H} NMR (CD<sub>2</sub>Cl<sub>2</sub>): δ 180-184 (br, CO), 166.65, 158.60, 135.88, 132.25, 129.73, 126.27, 121.11, 59.73 (N-CH), 23-27 (acetate-CH<sub>3</sub>), 19.75 (CH<sub>3</sub>), 16.99 (CH<sub>3</sub>) ppm. Anal. Calc. (C<sub>24</sub>H<sub>29</sub>CoN<sub>2</sub>O<sub>6</sub>): C, 57.60; H, 5.84; N, 5.60 %. Found: C, 57.39; H, 5.82; N, 5.71 %. In the <sup>1</sup>H NMR spectrum in dms<sub>o</sub>-d<sub>6</sub>, two sets of signals were observed in 1:0.39 ratio. Data for the major set: δ 8.01 (s, 2H, N=CH), 7.03 and 6.97 (s, 4H), 4.21 (AA'BB', 2H, N-CH), 4.05 (AA'BB', 2H, N-CH), 2.52 (s, 6H, CH<sub>3</sub>), 2.20 (s, 6H, CH<sub>3</sub>), 1.51 (s, 3H, acetate-CH<sub>3</sub>) ppm. Data for the minor set: δ 8.01 (s, 2H, N=CH), 7.16 (s, 2H), 7.10 (s, 2H), 4.16 (s, 4H, N-CH<sub>2</sub>), 2.60 (s, 6H, CH<sub>3</sub>), 2.26 (s, 6H, CH<sub>3</sub>), 1.51 (s, 3H, acetate-CH<sub>3</sub>) ppm.

**(Me-sal-cis-cy)Co(OAc)·2(HOAc).** This complex can be prepared by the same procedure as that of (Me-salcy)Co(OAc)·2(HOAc) using (Me-sal-cis-cy)(H)<sub>2</sub>. Yield was 93%. <sup>1</sup>H NMR (CD<sub>2</sub>Cl<sub>2</sub>): δ 13.60 (br, 2H, OH), 7.41(s, 2H), 7.28 (s, 2H), 6.17 (br, 2H, N=CH), 4.94 (br, 2H, N-CH), 3.32 (br, 6H, CH<sub>3</sub>), 2.96 (s, 6H, CH<sub>3</sub>), 2.12 (br, 4H, CH<sub>2</sub>), 1.72 (s, 9H, acetate-CH<sub>3</sub>), 1.66 (br, 2H, CH<sub>2</sub>), 1.60 (br, 2H, CH<sub>2</sub>) ppm. Anal. Calc. (C<sub>30</sub>H<sub>39</sub>CoN<sub>2</sub>O<sub>8</sub>): C, 58.63; H, 6.40; N, 4.56 %. Found: C, 58.31; H, 6.36; N, 4.61 %.

## References

- [1] P. D. Knight, P. N. O'Shaughnessy, I. J. Munslow, B. S. Kimberley, P. Scott, *J. Organomet. Chem.* **2003**, *683*, 103-113.
- [2] P. J. Pospisil, D. H. Carsten, E. N. Jacobsen, *Chem. Eur. J.* **1996**, *2*, 974-980.

< The  $^1\text{H}$  spectrum of  $(\text{Me-salcy})\text{Co}(\text{OAc})\cdot 2(\text{HOAc})$  in  $\text{CD}_2\text{Cl}_2$  >

Signals marked with "\*" and "#" are the deuterated solvent signals and the residual solvent (or water) signals, respectively.

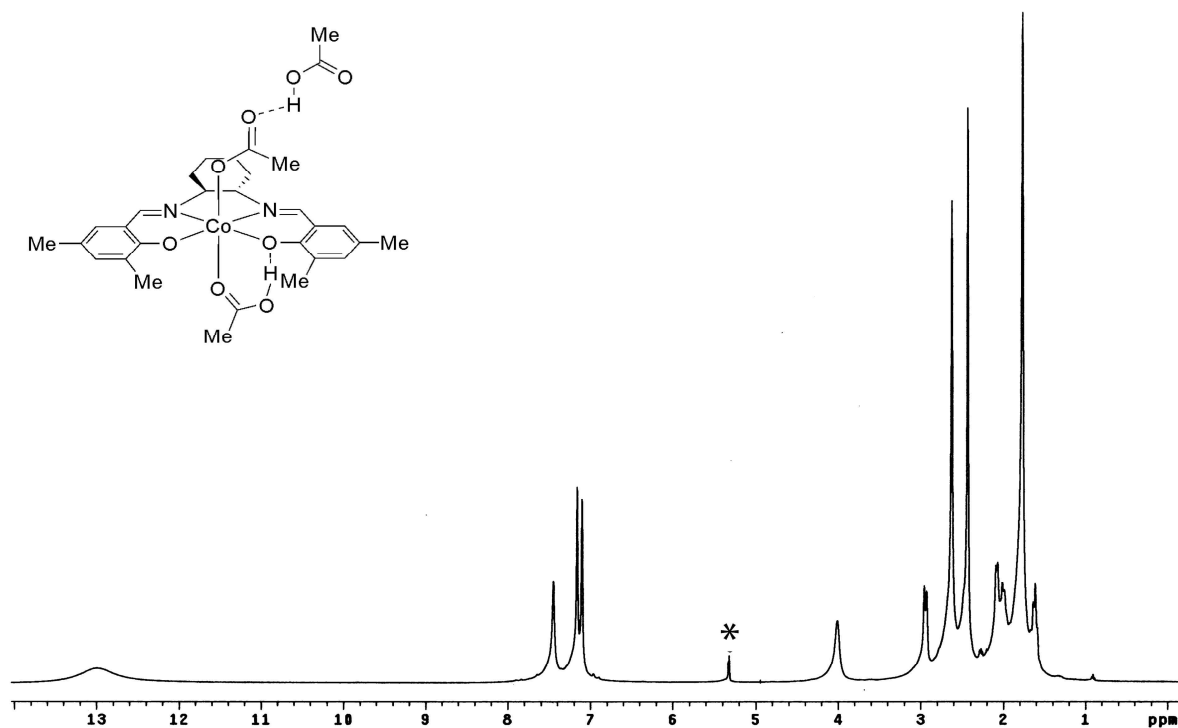

< The  $^{13}\text{C}$  spectrum of  $(\text{Me-salcy})\text{Co}(\text{OAc})\cdot 2(\text{HOAc})$  in  $\text{CD}_2\text{Cl}_2$  >

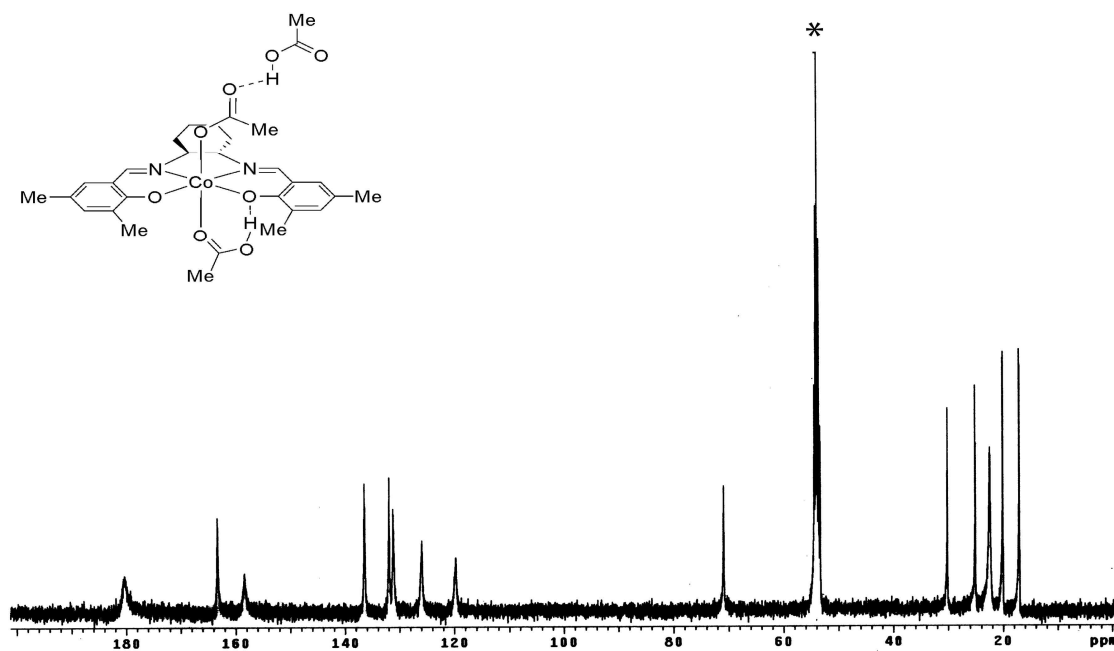

<The  $^1\text{H}$  NMR spectrum of  $(\text{Me-salcy})\text{Co}(\kappa^2\text{-OAc})$  in  $\text{CD}_2\text{Cl}_2$ >

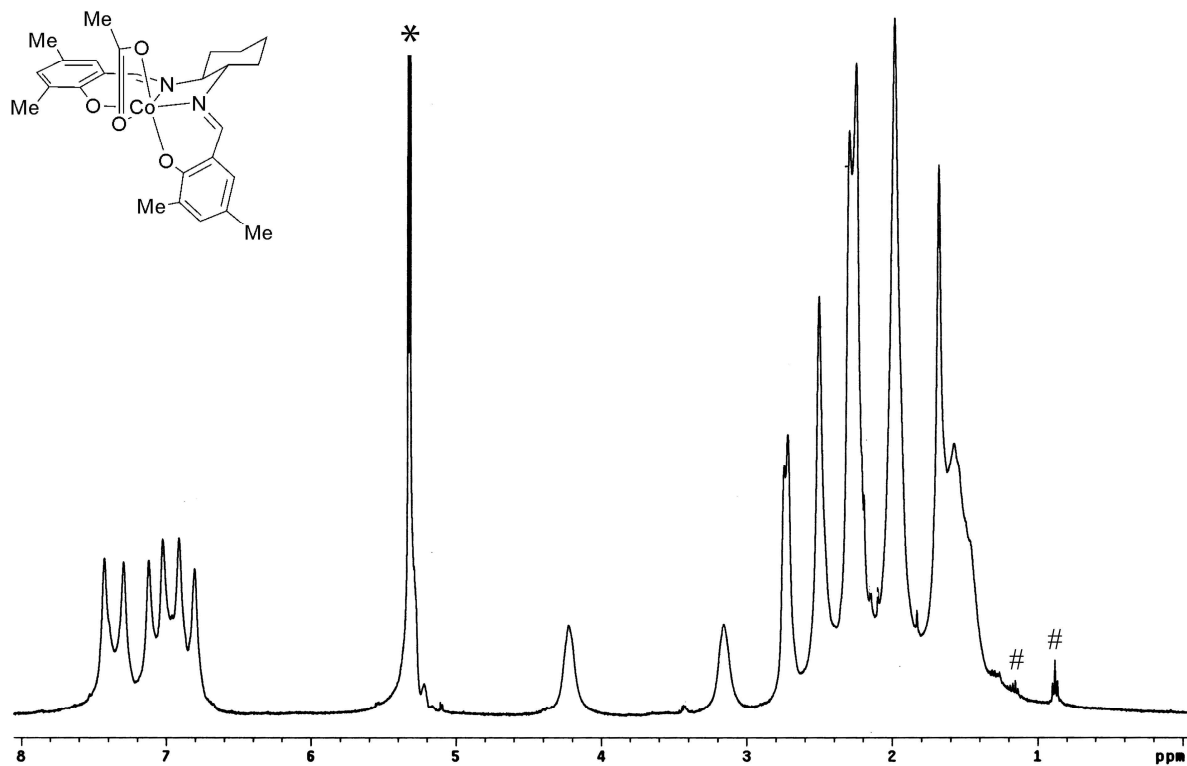

<The  $^1\text{H}$  NMR spectrum of  $(\text{Me-salcy})\text{Co}(\kappa^2\text{-OAc})$  in  $\text{dmsO-d}_6$ >

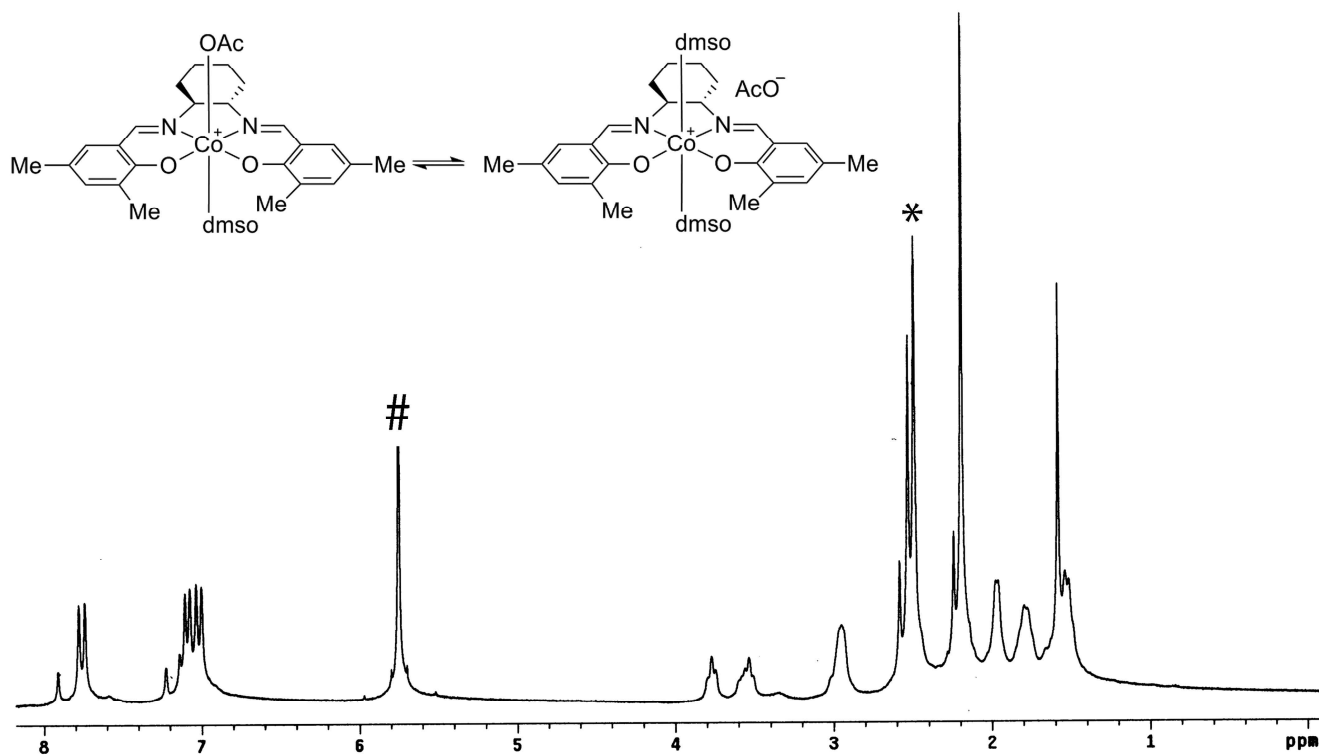

<The  $^1\text{H}$  NMR spectrum of  $(\text{Me-salcy})\text{Co}(\kappa^2\text{-OAc})$  in  $\text{THF-d}_8$ >

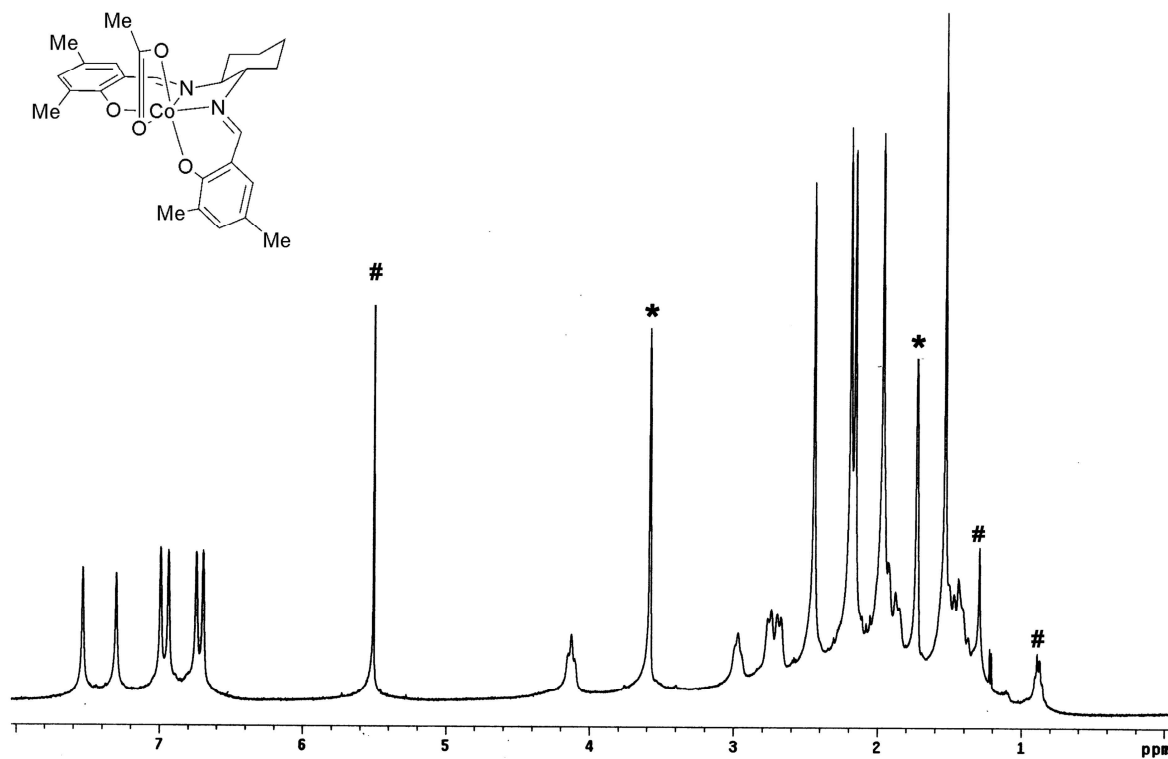

<The  $^1\text{H}$  NMR spectrum of  $(\text{Me-salcy})\text{Co}(\kappa^2\text{-NO}_3)$  in  $\text{dmsO-d}_6$ >

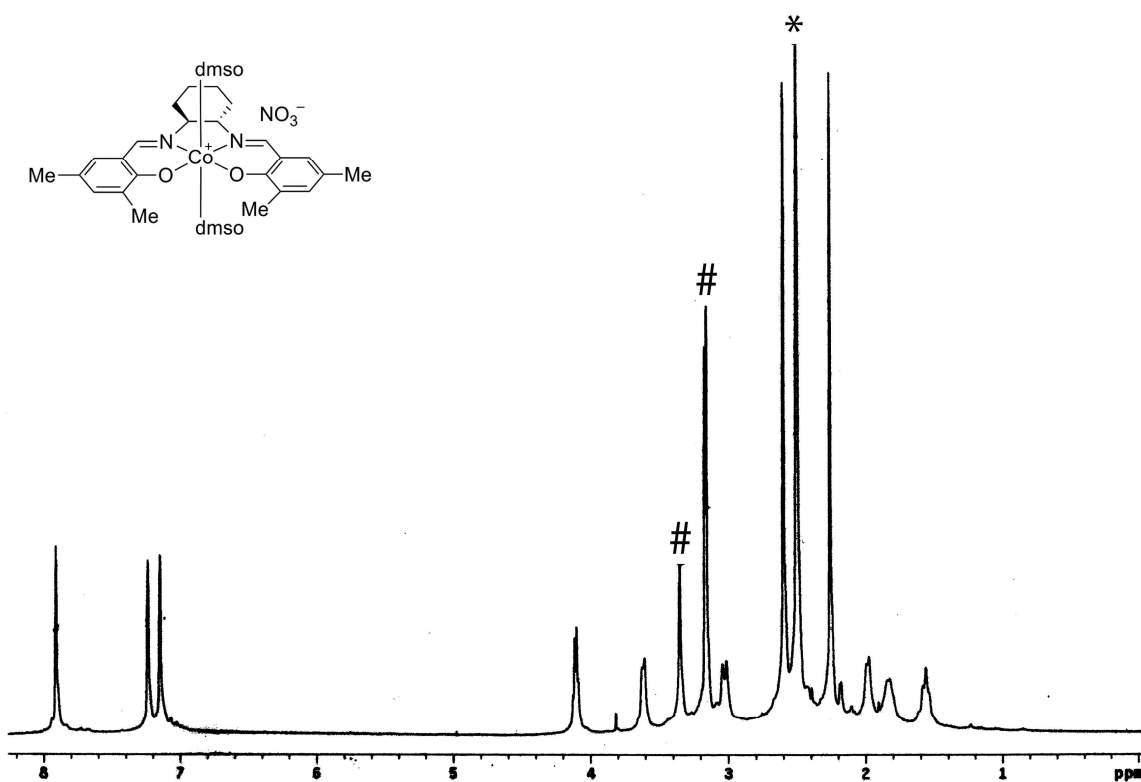



<The  $^1\text{H}$  NMR spectrum of (Me-salen)Co(OAc)·HOAc in  $\text{CD}_2\text{Cl}_2$ >

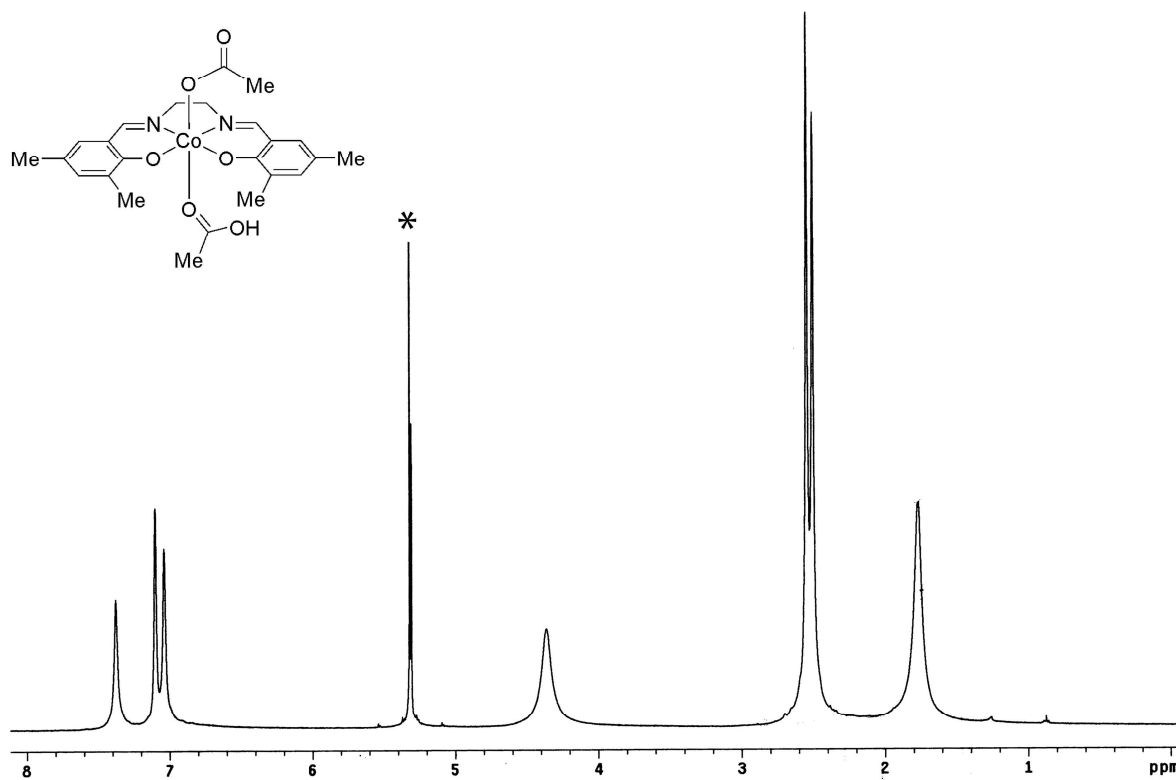

<The  $^{13}\text{C}$  NMR spectrum of (Me-salen)Co(OAc)·HOAc in  $\text{CD}_2\text{Cl}_2$ >

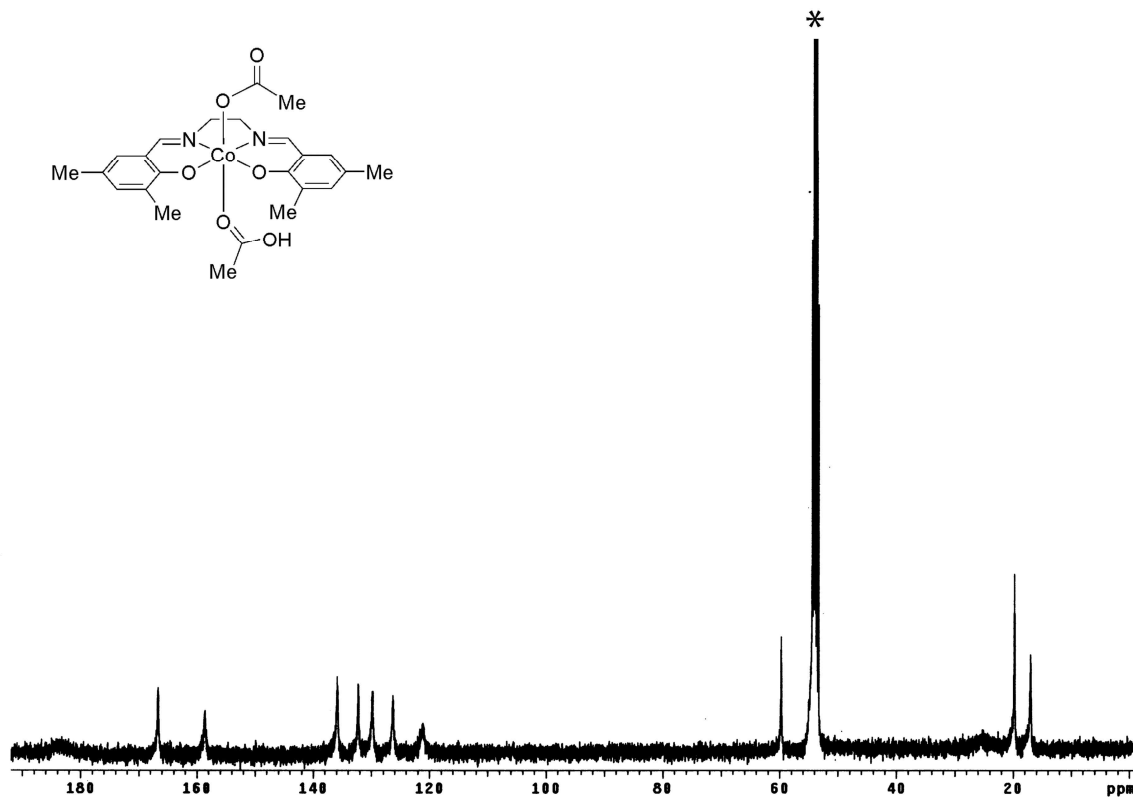

<The  $^1\text{H}$  NMR spectrum (dms $o$ - $d_6$ , 25  $^\circ\text{C}$ ) of (Me-salen)Co(OAc)( $\text{H}_2\text{O}$ ) >

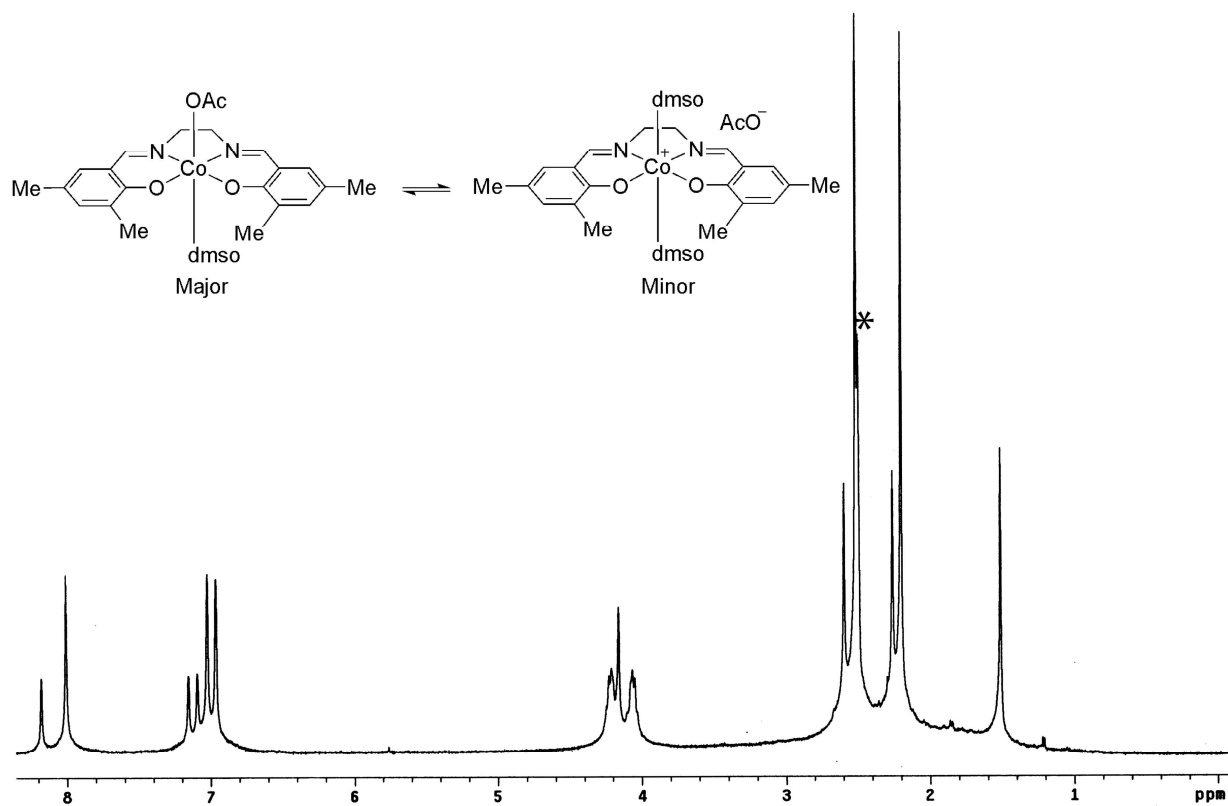

<The  $^1\text{H}$  NMR spectrum of (Me-sal-*cis*-cy)Co(OAc)·2HOAc in  $\text{CD}_2\text{Cl}_2$ >

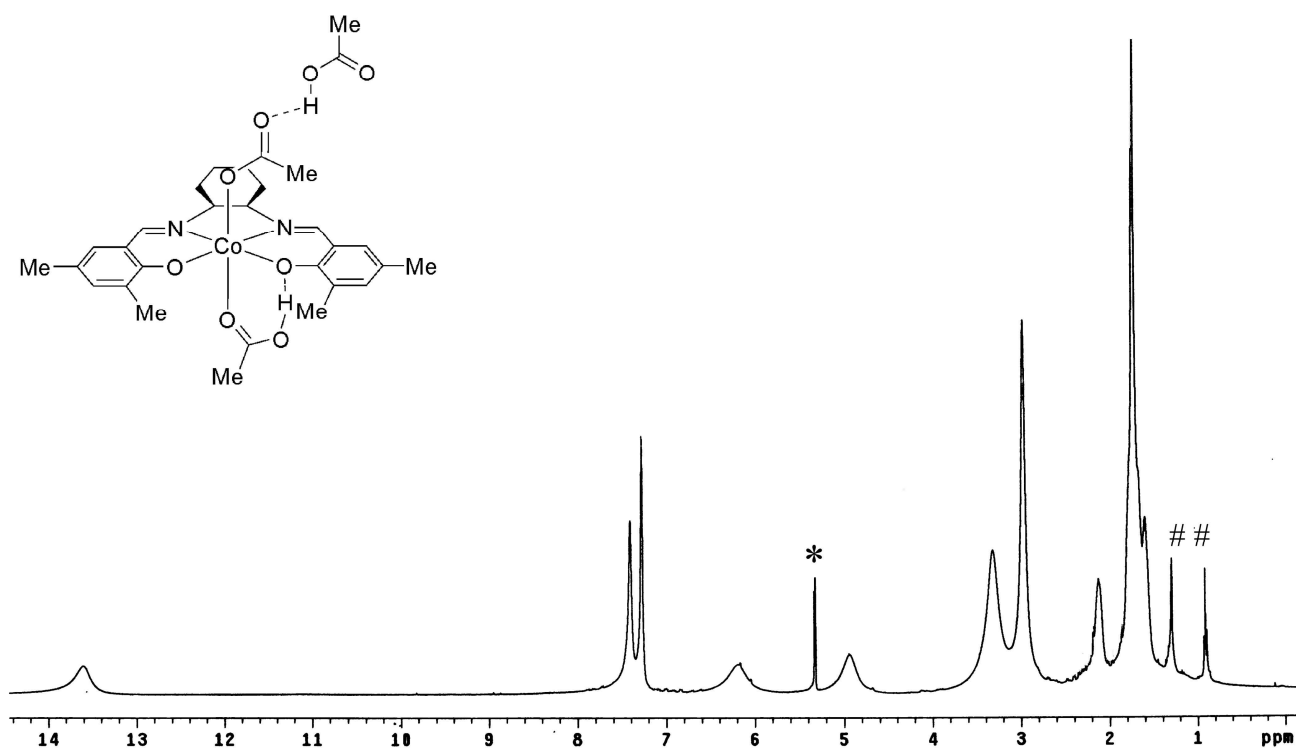

<The  $^1\text{H}$  NMR spectrum of  $(\text{Me-sal-cis-cy})\text{Co}(\text{OAc})\cdot 2\text{HOAc}$  in  $\text{dms}\text{-d}_6$ >

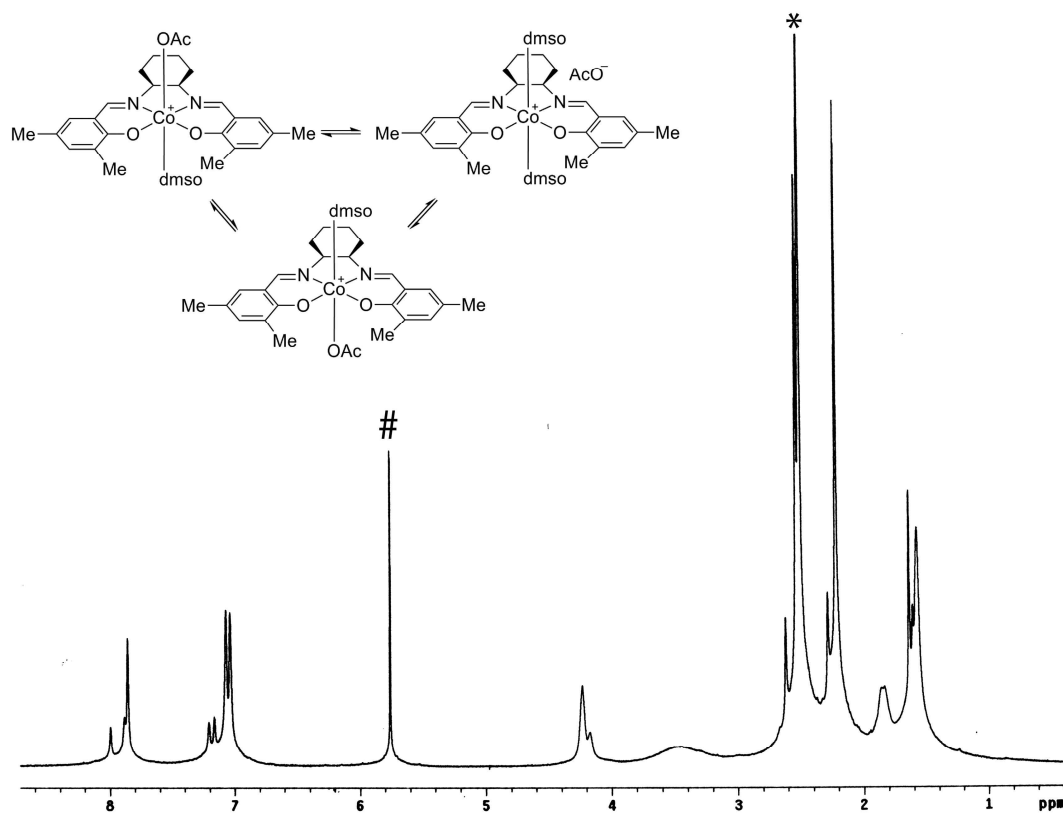

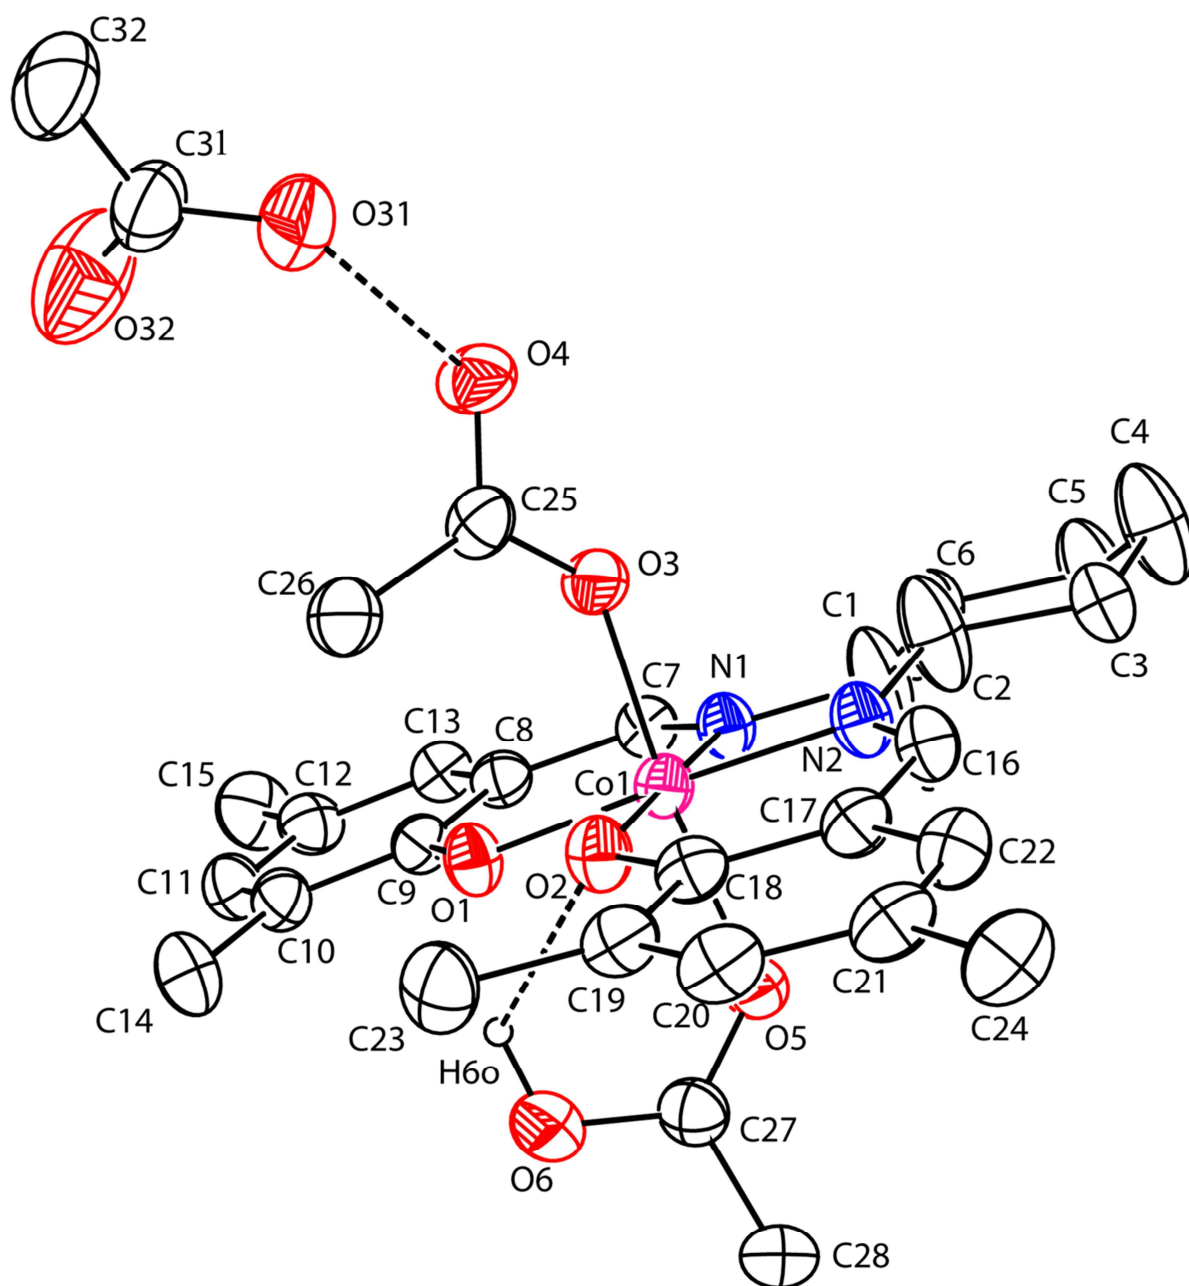

**Figure S1.** X-ray structures of (Me-salcy)Co(OAc)·2(HOAc).

**Table S3.** Bond lengths [Å] and angles [deg] for (Me-salcy)Co(OAc)·2(HOAc)

|            |          |            |          |            |          |
|------------|----------|------------|----------|------------|----------|
| Co(1)-O(2) | 1.880(3) | Co(1)-O(5) | 1.969(3) | O(1)-C(9)  | 1.339(5) |
| Co(1)-N(2) | 1.889(4) | N(1)-C(7)  | 1.274(5) | O(2)-C(18) | 1.318(5) |
| Co(1)-O(3) | 1.902(3) | N(1)-C(1)  | 1.460(6) | C(1)-C(2)  | 1.379(8) |
| Co(1)-N(1) | 1.902(3) | N(2)-C(16) | 1.287(6) | C(1)-C(6)  | 1.509(7) |
| Co(1)-O(1) | 1.910(3) | N(2)-C(2)  | 1.475(6) | C(2)-C(3)  | 1.510(7) |

|                 |            |                  |            |                   |          |
|-----------------|------------|------------------|------------|-------------------|----------|
| C(3)-C(4)       | 1.522(8)   | O(3)-Co(1)-N(1)  | 87.49(14)  | C(11)-C(10)-C(9)  | 118.6(4) |
| C(4)-C(5)       | 1.385(8)   | O(2)-Co(1)-O(1)  | 85.24(13)  | C(11)-C(10)-C(14) | 121.6(4) |
| C(5)-C(6)       | 1.511(7)   | N(2)-Co(1)-O(1)  | 177.34(14) | C(9)-C(10)-C(14)  | 119.8(4) |
| C(7)-C(8)       | 1.442(6)   | O(3)-Co(1)-O(1)  | 94.82(13)  | C(12)-C(11)-C(10) | 123.5(4) |
| C(8)-C(13)      | 1.409(6)   | N(1)-Co(1)-O(1)  | 94.44(14)  | C(13)-C(12)-C(11) | 117.5(4) |
| C(8)-C(9)       | 1.410(6)   | O(2)-Co(1)-O(5)  | 88.33(13)  | C(13)-C(12)-C(15) | 120.5(5) |
| C(9)-C(10)      | 1.403(6)   | N(2)-Co(1)-O(5)  | 86.83(15)  | C(11)-C(12)-C(15) | 122.0(5) |
| C(10)-C(11)     | 1.390(6)   | O(3)-Co(1)-O(5)  | 174.38(13) | C(12)-C(13)-C(8)  | 121.5(4) |
| C(10)-C(14)     | 1.503(6)   | N(1)-Co(1)-O(5)  | 90.58(14)  | N(2)-C(16)-C(17)  | 125.6(4) |
| C(11)-C(12)     | 1.389(7)   | O(1)-Co(1)-O(5)  | 90.59(13)  | C(22)-C(17)-C(18) | 120.0(4) |
| C(12)-C(13)     | 1.374(6)   | C(7)-N(1)-C(1)   | 122.4(4)   | C(22)-C(17)-C(16) | 117.4(4) |
| C(12)-C(15)     | 1.523(7)   | C(7)-N(1)-Co(1)  | 125.7(3)   | C(18)-C(17)-C(16) | 122.6(4) |
| C(16)-C(17)     | 1.431(6)   | C(1)-N(1)-Co(1)  | 111.8(3)   | O(2)-C(18)-C(17)  | 124.5(4) |
| C(17)-C(22)     | 1.410(6)   | C(16)-N(2)-C(2)  | 122.9(4)   | O(2)-C(18)-C(19)  | 116.9(4) |
| C(17)-C(18)     | 1.412(6)   | C(16)-N(2)-Co(1) | 125.3(3)   | C(17)-C(18)-C(19) | 118.5(4) |
| C(18)-C(19)     | 1.422(6)   | C(2)-N(2)-Co(1)  | 111.8(3)   | C(20)-C(19)-C(18) | 118.0(5) |
| C(19)-C(20)     | 1.380(6)   | C(9)-O(1)-Co(1)  | 126.5(3)   | C(20)-C(19)-C(23) | 123.2(4) |
| C(19)-C(23)     | 1.508(7)   | C(18)-O(2)-Co(1) | 125.5(3)   | C(18)-C(19)-C(23) | 118.8(4) |
| C(20)-C(21)     | 1.392(7)   | C(2)-C(1)-N(1)   | 111.9(5)   | C(19)-C(20)-C(21) | 124.9(4) |
| C(21)-C(22)     | 1.375(6)   | C(2)-C(1)-C(6)   | 118.4(5)   | C(22)-C(21)-C(20) | 116.4(4) |
| C(21)-C(24)     | 1.503(6)   | N(1)-C(1)-C(6)   | 119.0(4)   | C(22)-C(21)-C(24) | 121.4(5) |
| O(3)-C(25)      | 1.280(5)   | C(1)-C(2)-N(2)   | 110.4(5)   | C(20)-C(21)-C(24) | 122.2(4) |
| O(4)-C(25)      | 1.240(5)   | C(1)-C(2)-C(3)   | 117.2(5)   | C(21)-C(22)-C(17) | 122.1(5) |
| C(25)-C(26)     | 1.494(7)   | N(2)-C(2)-C(3)   | 117.9(5)   | C(25)-O(3)-Co(1)  | 132.4(3) |
| O(5)-C(27)      | 1.235(5)   | C(2)-C(3)-C(4)   | 111.2(5)   | O(4)-C(25)-O(3)   | 118.7(4) |
| O(6)-C(27)      | 1.293(6)   | C(5)-C(4)-C(3)   | 117.0(6)   | O(4)-C(25)-C(26)  | 118.5(4) |
| C(27)-C(28)     | 1.480(7)   | C(4)-C(5)-C(6)   | 118.9(5)   | O(3)-C(25)-C(26)  | 122.7(4) |
| O(31)-C(31)     | 1.246(7)   | C(1)-C(6)-C(5)   | 110.8(4)   | C(27)-O(5)-Co(1)  | 126.8(3) |
| O(32)-C(31)     | 1.217(8)   | N(1)-C(7)-C(8)   | 126.6(4)   | O(5)-C(27)-O(6)   | 122.3(5) |
| C(31)-C(32)     | 1.498(9)   | C(13)-C(8)-C(9)  | 119.8(4)   | O(5)-C(27)-C(28)  | 122.2(5) |
| O(2)-Co(1)-N(2) | 95.34(14)  | C(13)-C(8)-C(7)  | 117.0(4)   | O(6)-C(27)-C(28)  | 115.3(4) |
| O(2)-Co(1)-O(3) | 93.63(13)  | C(9)-C(8)-C(7)   | 123.1(4)   | O(32)-C(31)-O(31) | 122.7(7) |
| N(2)-Co(1)-O(3) | 87.74(15)  | O(1)-C(9)-C(10)  | 117.8(4)   | O(32)-C(31)-C(32) | 121.5(6) |
| O(2)-Co(1)-N(1) | 178.86(14) | O(1)-C(9)-C(8)   | 123.2(4)   | O(31)-C(31)-C(32) | 115.8(7) |
| N(2)-Co(1)-N(1) | 84.93(15)  | C(10)-C(9)-C(8)  | 119.0(4)   |                   |          |

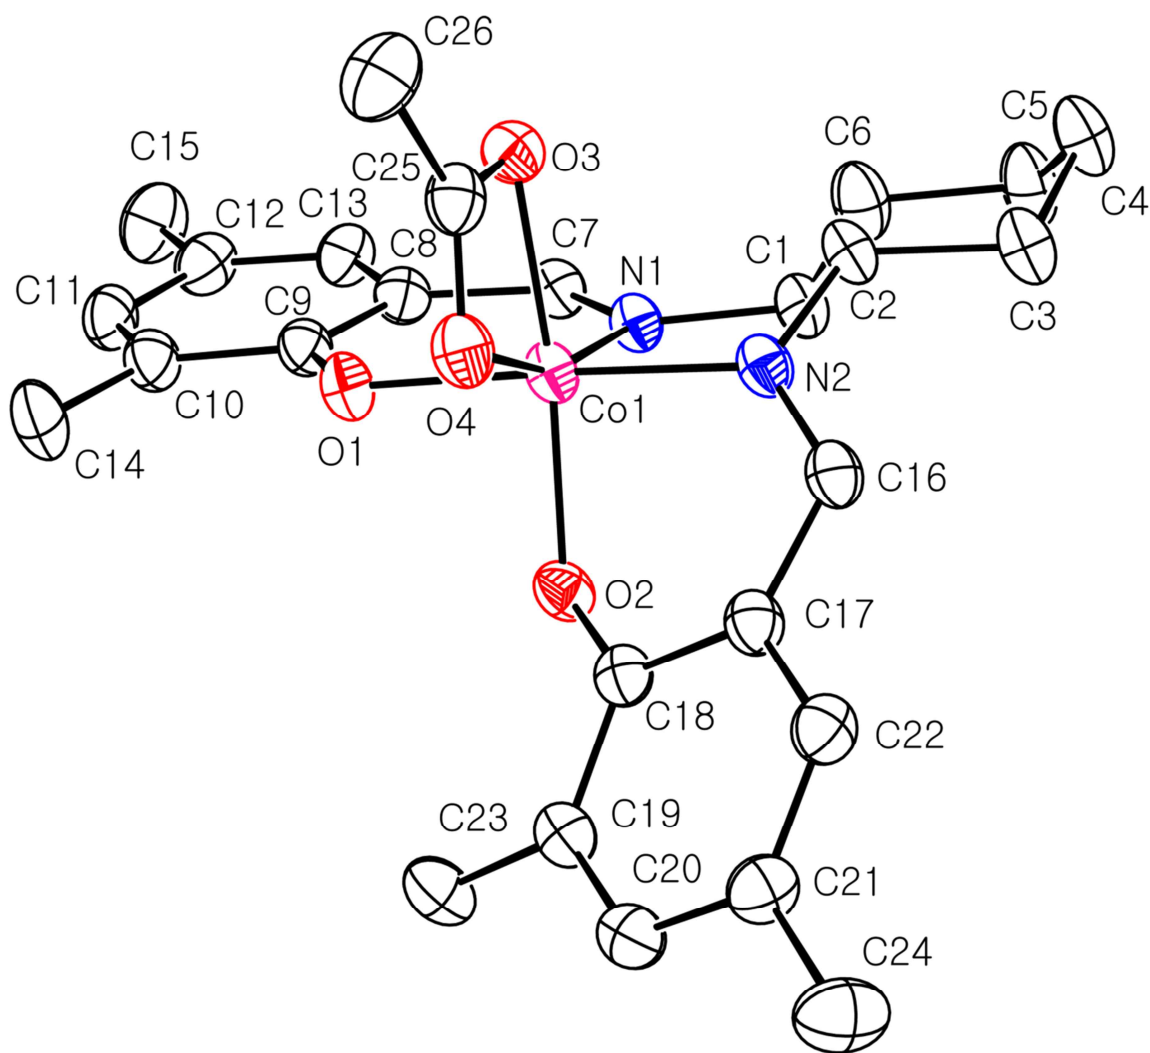

**Figure S2.** X-ray structure of (Me-salcy)Co( $\kappa^2$ -OAc).

**Table S4.** Bond lengths [Å] and angles [deg] for (Me-salcy)Co( $\kappa^2$ -OAc).

|             |          |            |          |             |          |
|-------------|----------|------------|----------|-------------|----------|
| Co(1)-O(1)  | 1.878(2) | O(2)-C(18) | 1.322(4) | C(9)-C(10)  | 1.421(4) |
| Co(1)-O(2)  | 1.880(2) | O(3)-C(25) | 1.269(4) | C(10)-C(11) | 1.376(5) |
| Co(1)-N(2)  | 1.891(3) | O(4)-C(25) | 1.264(4) | C(10)-C(14) | 1.503(5) |
| Co(1)-N(1)  | 1.892(2) | C(1)-C(6)  | 1.522(4) | C(11)-C(12) | 1.407(5) |
| Co(1)-O(3)  | 1.962(2) | C(1)-C(2)  | 1.542(4) | C(12)-C(13) | 1.363(5) |
| Co(1)-O(4)  | 1.990(2) | C(2)-C(3)  | 1.512(4) | C(12)-C(15) | 1.513(5) |
| Co(1)-C(25) | 2.311(3) | C(3)-C(4)  | 1.525(5) | C(16)-C(17) | 1.435(4) |
| N(1)-C(7)   | 1.289(4) | C(4)-C(5)  | 1.523(6) | C(17)-C(22) | 1.408(4) |
| N(1)-C(1)   | 1.480(4) | C(5)-C(6)  | 1.533(5) | C(17)-C(18) | 1.421(4) |
| N(2)-C(16)  | 1.289(4) | C(7)-C(8)  | 1.431(4) | C(18)-C(19) | 1.421(4) |
| N(2)-C(2)   | 1.473(4) | C(8)-C(9)  | 1.418(4) | C(19)-C(20) | 1.379(5) |
| O(1)-C(9)   | 1.310(4) | C(8)-C(13) | 1.420(5) | C(19)-C(23) | 1.514(5) |

|                  |            |                   |            |                      |           |
|------------------|------------|-------------------|------------|----------------------|-----------|
| C(20)-C(21)      | 1.402(5)   | C(7)-N(1)-Co(1)   | 123.9(2)   | C(10)-C(11)-C(12)    | 123.6(3)  |
| C(21)-C(22)      | 1.371(5)   | C(1)-N(1)-Co(1)   | 113.55(19) | C(13)-C(12)-C(11)    | 116.9(3)  |
| C(21)-C(24)      | 1.504(5)   | C(16)-N(2)-C(2)   | 123.7(3)   | C(13)-C(12)-C(15)    | 122.0(4)  |
| C(25)-C(26)      | 1.493(5)   | C(16)-N(2)-Co(1)  | 124.0(2)   | C(11)-C(12)-C(15)    | 121.1(4)  |
| C(101)-Cl(02)    | 1.707(8)   | C(2)-N(2)-Co(1)   | 110.27(19) | C(12)-C(13)-C(8)     | 122.4(3)  |
| C(101)-Cl(01)    | 1.726(6)   | C(9)-O(1)-Co(1)   | 125.47(19) | N(2)-C(16)-C(17)     | 122.8(3)  |
|                  |            | C(18)-O(2)-Co(1)  | 117.81(19) | C(22)-C(17)-C(18)    | 120.2(3)  |
| O(1)-Co(1)-O(2)  | 88.05(10)  | C(25)-O(3)-Co(1)  | 88.63(19)  | C(22)-C(17)-C(16)    | 120.0(3)  |
| O(1)-Co(1)-N(2)  | 177.80(11) | C(25)-O(4)-Co(1)  | 87.55(19)  | C(18)-C(17)-C(16)    | 119.0(3)  |
| O(2)-Co(1)-N(2)  | 89.76(10)  | N(1)-C(1)-C(6)    | 116.4(3)   | O(2)-C(18)-C(17)     | 123.8(3)  |
| O(1)-Co(1)-N(1)  | 96.23(10)  | N(1)-C(1)-C(2)    | 105.8(2)   | O(2)-C(18)-C(19)     | 118.5(3)  |
| O(2)-Co(1)-N(1)  | 98.76(10)  | C(6)-C(1)-C(2)    | 111.1(3)   | C(17)-C(18)-C(19)    | 117.5(3)  |
| N(2)-Co(1)-N(1)  | 83.94(11)  | N(2)-C(2)-C(3)    | 117.8(3)   | C(20)-C(19)-C(18)    | 119.3(3)  |
| O(1)-Co(1)-O(3)  | 89.69(10)  | N(2)-C(2)-C(1)    | 102.0(2)   | C(20)-C(19)-C(23)    | 122.1(3)  |
| O(2)-Co(1)-O(3)  | 166.07(9)  | C(3)-C(2)-C(1)    | 111.1(3)   | C(18)-C(19)-C(23)    | 118.6(3)  |
| N(2)-Co(1)-O(3)  | 92.48(10)  | C(2)-C(3)-C(4)    | 108.8(3)   | C(19)-C(20)-C(21)    | 123.9(3)  |
| N(1)-Co(1)-O(3)  | 95.15(10)  | C(5)-C(4)-C(3)    | 111.5(3)   | C(22)-C(21)-C(20)    | 116.7(3)  |
| O(1)-Co(1)-O(4)  | 87.57(9)   | C(4)-C(5)-C(6)    | 112.5(3)   | C(22)-C(21)-C(24)    | 122.0(3)  |
| O(2)-Co(1)-O(4)  | 99.81(10)  | C(1)-C(6)-C(5)    | 109.8(3)   | C(20)-C(21)-C(24)    | 121.3(3)  |
| N(2)-Co(1)-O(4)  | 92.97(10)  | N(1)-C(7)-C(8)    | 126.2(3)   | C(21)-C(22)-C(17)    | 122.3(3)  |
| N(1)-Co(1)-O(4)  | 161.15(10) | C(9)-C(8)-C(13)   | 119.7(3)   | O(4)-C(25)-O(3)      | 117.3(3)  |
| O(3)-Co(1)-O(4)  | 66.35(9)   | C(9)-C(8)-C(7)    | 122.9(3)   | O(4)-C(25)-C(26)     | 121.9(3)  |
| O(1)-Co(1)-C(25) | 86.97(11)  | C(13)-C(8)-C(7)   | 117.3(3)   | O(3)-C(25)-C(26)     | 120.9(3)  |
| O(2)-Co(1)-C(25) | 132.81(11) | O(1)-C(9)-C(8)    | 124.3(3)   | O(4)-C(25)-Co(1)     | 59.34(17) |
| N(2)-Co(1)-C(25) | 94.65(11)  | O(1)-C(9)-C(10)   | 117.9(3)   | O(3)-C(25)-Co(1)     | 58.08(17) |
| N(1)-Co(1)-C(25) | 128.43(12) | C(8)-C(9)-C(10)   | 117.8(3)   | C(26)-C(25)-Co(1)    | 176.6(3)  |
| O(3)-Co(1)-C(25) | 33.29(10)  | C(11)-C(10)-C(9)  | 119.5(3)   | Cl(02)-C(101)-Cl(01) | 113.9(4)  |
| O(4)-Co(1)-C(25) | 33.11(10)  | C(11)-C(10)-C(14) | 122.1(3)   |                      |           |
| C(7)-N(1)-C(1)   | 121.9(3)   | C(9)-C(10)-C(14)  | 118.3(3)   |                      |           |

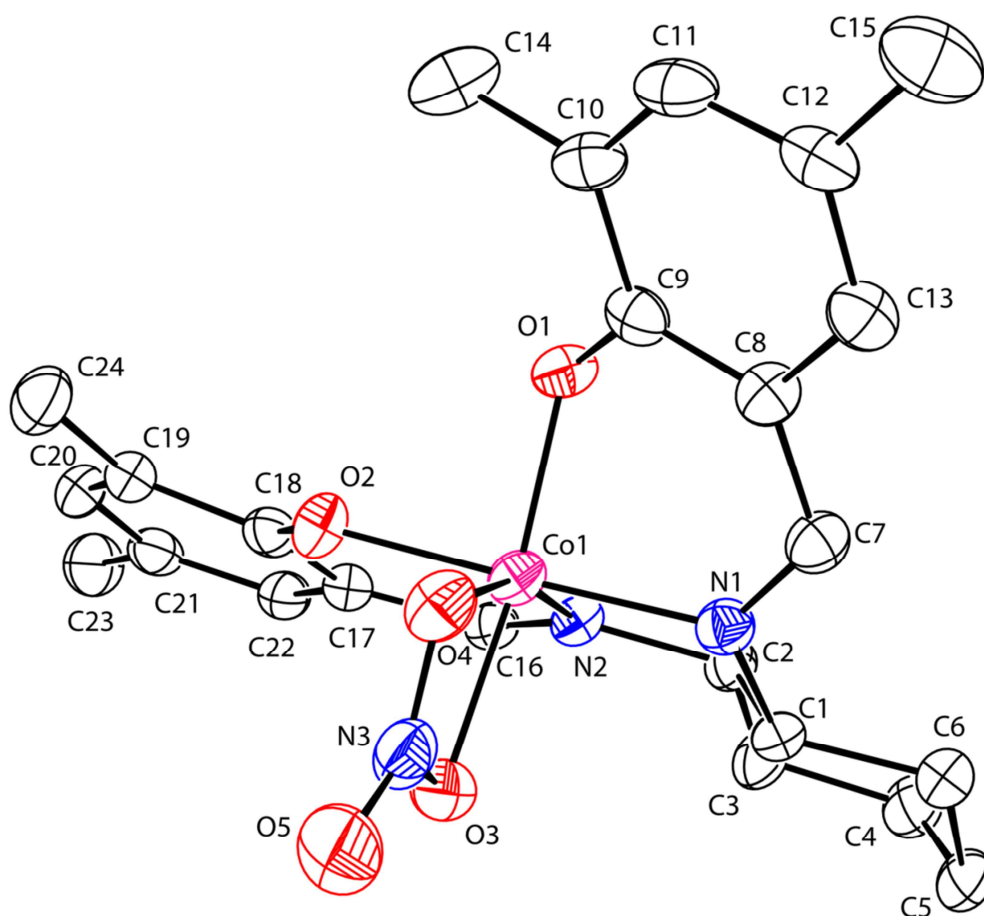

**Figure S3.** X-ray structure of (Me-salicy)Co( $\kappa^2$ -NO<sub>3</sub>).

**Table S5.** Bond lengths [Å] and angles [deg] for (Me-salicy)Co( $\kappa^2$ -NO<sub>3</sub>)

|            |          |             |          |                 |            |
|------------|----------|-------------|----------|-----------------|------------|
| Co(1)-O(1) | 1.858(2) | C(2)-C(3)   | 1.516(4) | C(17)-C(18)     | 1.424(5)   |
| Co(1)-O(2) | 1.870(2) | C(3)-C(4)   | 1.521(5) | C(18)-C(19)     | 1.418(5)   |
| Co(1)-N(2) | 1.883(3) | C(4)-C(5)   | 1.513(5) | C(19)-C(20)     | 1.368(5)   |
| Co(1)-N(1) | 1.904(3) | C(5)-C(6)   | 1.532(4) | C(19)-C(23)     | 1.509(4)   |
| Co(1)-O(4) | 1.980(2) | C(7)-C(8)   | 1.441(4) | C(20)-C(21)     | 1.414(5)   |
| Co(1)-O(3) | 1.990(2) | C(8)-C(13)  | 1.401(5) | C(21)-C(22)     | 1.370(5)   |
| Co(1)-N(3) | 2.379(4) | C(8)-C(9)   | 1.404(5) | C(21)-C(24)     | 1.517(5)   |
| N(1)-C(7)  | 1.277(4) | C(9)-C(10)  | 1.420(5) | N(3)-O(5)       | 1.210(4)   |
| N(1)-C(1)  | 1.471(4) | C(10)-C(11) | 1.385(5) | N(3)-O(3)       | 1.283(4)   |
| N(2)-C(16) | 1.288(4) | C(10)-C(14) | 1.503(5) | N(3)-O(4)       | 1.290(4)   |
| N(2)-C(2)  | 1.490(4) | C(11)-C(12) | 1.388(5) | O(1)-Co(1)-O(2) | 88.77(10)  |
| O(1)-C(9)  | 1.341(4) | C(12)-C(13) | 1.369(5) | O(1)-Co(1)-N(2) | 100.39(11) |
| O(2)-C(18) | 1.301(4) | C(12)-C(15) | 1.513(5) | O(2)-Co(1)-N(2) | 96.09(12)  |
| C(1)-C(6)  | 1.519(4) | C(16)-C(17) | 1.429(5) | O(1)-Co(1)-N(1) | 89.69(11)  |
| C(1)-C(2)  | 1.520(4) | C(17)-C(22) | 1.402(5) | O(2)-Co(1)-N(1) | 178.42(11) |



|                  |            |                   |          |                   |           |
|------------------|------------|-------------------|----------|-------------------|-----------|
| N(2)-Co(1)-N(1)  | 83.84(12)  | N(1)-C(1)-C(6)    | 118.2(3) | C(12)-C(13)-C(8)  | 122.3(4)  |
| O(1)-Co(1)-O(4)  | 98.34(11)  | N(1)-C(1)-C(2)    | 102.7(3) | N(2)-C(16)-C(17)  | 127.0(3)  |
| O(2)-Co(1)-O(4)  | 87.60(10)  | C(6)-C(1)-C(2)    | 111.9(3) | C(22)-C(17)-C(18) | 120.0(3)  |
| N(2)-Co(1)-O(4)  | 160.98(11) | N(2)-C(2)-C(3)    | 116.2(3) | C(22)-C(17)-C(16) | 118.4(3)  |
| N(1)-Co(1)-O(4)  | 92.97(11)  | N(2)-C(2)-C(1)    | 105.8(3) | C(18)-C(17)-C(16) | 121.5(3)  |
| O(1)-Co(1)-O(3)  | 163.71(11) | C(3)-C(2)-C(1)    | 111.8(3) | O(2)-C(18)-C(19)  | 117.9(3)  |
| O(2)-Co(1)-O(3)  | 88.99(10)  | C(2)-C(3)-C(4)    | 110.4(3) | O(2)-C(18)-C(17)  | 124.5(3)  |
| N(2)-Co(1)-O(3)  | 95.89(11)  | C(5)-C(4)-C(3)    | 112.9(3) | C(19)-C(18)-C(17) | 117.6(3)  |
| N(1)-Co(1)-O(3)  | 92.59(11)  | C(4)-C(5)-C(6)    | 110.9(3) | C(20)-C(19)-C(18) | 119.5(3)  |
| O(4)-Co(1)-O(3)  | 65.45(11)  | C(1)-C(6)-C(5)    | 108.1(3) | C(20)-C(19)-C(23) | 122.2(3)  |
| O(1)-Co(1)-N(3)  | 131.12(12) | N(1)-C(7)-C(8)    | 123.2(3) | C(18)-C(19)-C(23) | 118.3(3)  |
| O(2)-Co(1)-N(3)  | 87.27(11)  | C(13)-C(8)-C(9)   | 119.8(3) | C(19)-C(20)-C(21) | 123.8(3)  |
| N(2)-Co(1)-N(3)  | 128.48(13) | C(13)-C(8)-C(7)   | 121.4(4) | C(22)-C(21)-C(20) | 116.4(4)  |
| N(1)-Co(1)-N(3)  | 94.01(12)  | C(9)-C(8)-C(7)    | 118.6(3) | C(22)-C(21)-C(24) | 123.2(4)  |
| O(4)-Co(1)-N(3)  | 32.83(10)  | O(1)-C(9)-C(8)    | 123.2(3) | C(20)-C(21)-C(24) | 120.4(4)  |
| O(3)-Co(1)-N(3)  | 32.63(10)  | O(1)-C(9)-C(10)   | 117.8(4) | C(21)-C(22)-C(17) | 122.5(3)  |
| C(7)-N(1)-C(1)   | 123.6(3)   | C(8)-C(9)-C(10)   | 118.8(3) | O(5)-N(3)-O(3)    | 123.9(4)  |
| C(7)-N(1)-Co(1)  | 123.9(2)   | C(11)-C(10)-C(9)  | 118.0(4) | O(5)-N(3)-O(4)    | 123.0(4)  |
| C(1)-N(1)-Co(1)  | 109.9(2)   | C(11)-C(10)-C(14) | 122.4(3) | O(3)-N(3)-O(4)    | 113.1(3)  |
| C(16)-N(2)-C(2)  | 122.1(3)   | C(9)-C(10)-C(14)  | 119.6(4) | O(5)-N(3)-Co(1)   | 178.5(3)  |
| C(16)-N(2)-Co(1) | 123.8(2)   | C(10)-C(11)-C(12) | 124.1(3) | O(3)-N(3)-Co(1)   | 56.79(18) |
| C(2)-N(2)-Co(1)  | 113.7(2)   | C(13)-C(12)-C(11) | 116.9(4) | O(4)-N(3)-Co(1)   | 56.33(18) |
| C(9)-O(1)-Co(1)  | 115.5(2)   | C(13)-C(12)-C(15) | 121.8(4) | N(3)-O(3)-Co(1)   | 90.6(2)   |
| C(18)-O(2)-Co(1) | 126.2(2)   | C(11)-C(12)-C(15) | 121.3(4) | N(3)-O(4)-Co(1)   | 90.8(2)   |

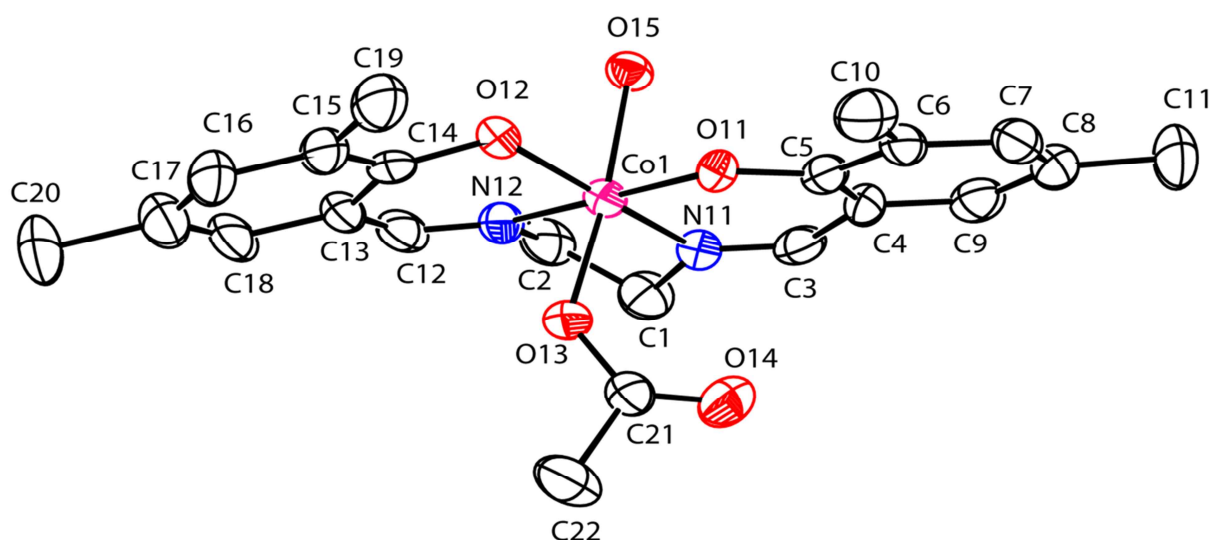

**Figure S4.** X-ray structure of (Me-salen)Co(OAc)(H<sub>2</sub>O).

**Table S6.** Bond lengths [Å] and angles [deg] for (Me-salen)Co(OAc)(H<sub>2</sub>O)

|             |           |                   |           |                   |           |
|-------------|-----------|-------------------|-----------|-------------------|-----------|
| Co(1)-O(13) | 1.875(7)  | C(17)-C(18)       | 1.358(16) | C(5)-C(4)-C(9)    | 119.3(10) |
| Co(1)-N(11) | 1.882(9)  | C(17)-C(20)       | 1.536(17) | C(3)-C(4)-C(9)    | 118.4(11) |
| Co(1)-N(12) | 1.895(9)  | C(21)-C(22)       | 1.537(17) | O(11)-C(5)-C(6)   | 118.6(10) |
| Co(1)-O(11) | 1.905(7)  | O(13)-Co(1)-N(11) | 96.6(3)   | O(11)-C(5)-C(4)   | 123.2(10) |
| Co(1)-O(12) | 1.908(7)  | O(13)-Co(1)-N(12) | 88.8(3)   | C(6)-C(5)-C(4)    | 118.2(10) |
| Co(1)-O(15) | 1.970(6)  | N(11)-Co(1)-N(12) | 86.2(4)   | C(7)-C(6)-C(5)    | 119.1(12) |
| N(11)-C(3)  | 1.266(12) | O(13)-Co(1)-O(11) | 93.0(3)   | C(7)-C(6)-C(10)   | 120.1(11) |
| N(11)-C(1)  | 1.449(12) | N(11)-Co(1)-O(11) | 93.6(3)   | C(5)-C(6)-C(10)   | 120.7(11) |
| N(12)-C(12) | 1.311(13) | N(12)-Co(1)-O(11) | 178.3(3)  | C(6)-C(7)-C(8)    | 123.5(11) |
| N(12)-C(2)  | 1.469(14) | O(13)-Co(1)-O(12) | 86.7(3)   | C(9)-C(8)-C(7)    | 118.7(11) |
| O(11)-C(5)  | 1.328(11) | N(11)-Co(1)-O(12) | 175.6(3)  | C(9)-C(8)-C(11)   | 120.8(13) |
| O(12)-C(14) | 1.341(11) | N(12)-Co(1)-O(12) | 91.1(4)   | C(7)-C(8)-C(11)   | 120.4(12) |
| O(13)-C(21) | 1.282(13) | O(11)-Co(1)-O(12) | 89.1(3)   | C(8)-C(9)-C(4)    | 121.0(11) |
| O(14)-C(21) | 1.207(15) | O(13)-Co(1)-O(15) | 173.7(3)  | N(12)-C(12)-C(13) | 124.8(11) |
| C(1)-C(2)   | 1.536(15) | N(11)-Co(1)-O(15) | 89.1(3)   | C(18)-C(13)-C(14) | 121.2(11) |
| C(3)-C(4)   | 1.432(14) | N(12)-Co(1)-O(15) | 89.0(3)   | C(18)-C(13)-C(12) | 115.8(11) |
| C(4)-C(5)   | 1.406(14) | O(11)-Co(1)-O(15) | 89.3(3)   | C(14)-C(13)-C(12) | 122.7(10) |
| C(4)-C(9)   | 1.434(14) | O(12)-Co(1)-O(15) | 87.4(3)   | O(12)-C(14)-C(13) | 123.1(10) |
| C(5)-C(6)   | 1.396(15) | C(3)-N(11)-C(1)   | 120.4(10) | O(12)-C(14)-C(15) | 119.1(10) |
| C(6)-C(7)   | 1.369(15) | C(3)-N(11)-Co(1)  | 126.5(8)  | C(13)-C(14)-C(15) | 117.7(10) |
| C(6)-C(10)  | 1.487(15) | C(1)-N(11)-Co(1)  | 113.1(7)  | C(16)-C(15)-C(14) | 118.0(12) |
| C(7)-C(8)   | 1.372(16) | C(12)-N(12)-C(2)  | 122.2(10) | C(16)-C(15)-C(19) | 122.3(12) |
| C(8)-C(9)   | 1.330(15) | C(12)-N(12)-Co(1) | 126.6(8)  | C(14)-C(15)-C(19) | 119.7(10) |
| C(8)-C(11)  | 1.539(15) | C(2)-N(12)-Co(1)  | 111.1(8)  | C(15)-C(16)-C(17) | 125.7(13) |
| C(12)-C(13) | 1.407(15) | C(5)-O(11)-Co(1)  | 126.8(7)  | C(18)-C(17)-C(16) | 114.9(12) |
| C(13)-C(18) | 1.380(15) | C(14)-O(12)-Co(1) | 124.9(6)  | C(18)-C(17)-C(20) | 125.2(13) |
| C(13)-C(14) | 1.393(14) | C(21)-O(13)-Co(1) | 128.7(8)  | C(16)-C(17)-C(20) | 119.8(14) |
| C(14)-C(15) | 1.399(14) | N(11)-C(1)-C(2)   | 106.0(9)  | C(17)-C(18)-C(13) | 122.1(12) |
| C(15)-C(16) | 1.352(15) | N(12)-C(2)-C(1)   | 107.1(9)  | O(14)-C(21)-O(13) | 128.0(13) |
| C(15)-C(19) | 1.505(15) | N(11)-C(3)-C(4)   | 126.5(11) | O(14)-C(21)-C(22) | 118.4(12) |
| C(16)-C(17) | 1.398(17) | C(5)-C(4)-C(3)    | 122.3(10) | O(13)-C(21)-C(22) | 113.4(13) |

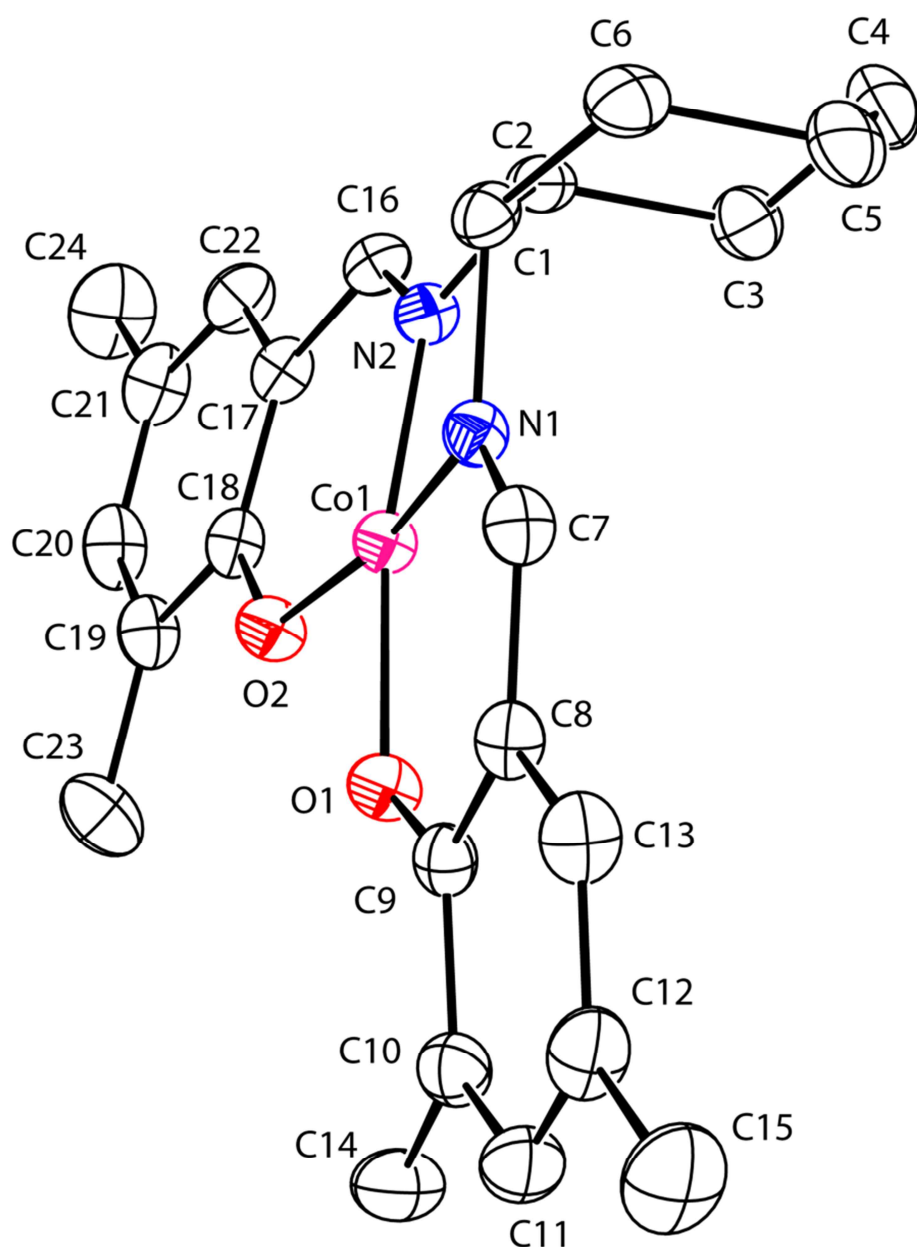

**Figure S5.** X-ray structure of (Me-sal-cis-cy)Co(II).

**Table S7.** Bond lengths [Å] and angles [deg] for (Me-sal-cis-cy)Co(II)

|            |            |            |          |             |          |
|------------|------------|------------|----------|-------------|----------|
| Co(1)-O(1) | 1.8436(14) | N(2)-C(2)  | 1.479(2) | C(4)-C(5)   | 1.517(4) |
| Co(1)-O(2) | 1.8514(13) | O(1)-C(9)  | 1.319(2) | C(5)-C(6)   | 1.514(4) |
| Co(1)-N(2) | 1.8525(17) | O(2)-C(18) | 1.316(2) | C(7)-C(8)   | 1.420(3) |
| Co(1)-N(1) | 1.8687(16) | C(1)-C(2)  | 1.523(3) | C(8)-C(9)   | 1.415(3) |
| N(1)-C(7)  | 1.297(3)   | C(1)-C(6)  | 1.524(3) | C(8)-C(13)  | 1.423(3) |
| N(1)-C(1)  | 1.494(3)   | C(2)-C(3)  | 1.523(3) | C(9)-C(10)  | 1.415(3) |
| N(2)-C(16) | 1.307(3)   | C(3)-C(4)  | 1.528(3) | C(10)-C(11) | 1.375(3) |

|                 |            |                   |            |                   |            |
|-----------------|------------|-------------------|------------|-------------------|------------|
| C(10)-C(14)     | 1.514(3)   | C(16)-N(2)-Co(1)  | 127.81(15) | C(9)-C(10)-C(14)  | 118.7(2)   |
| C(11)-C(12)     | 1.405(3)   | C(2)-N(2)-Co(1)   | 113.45(13) | C(10)-C(11)-C(12) | 123.2(2)   |
| C(12)-C(13)     | 1.355(3)   | C(9)-O(1)-Co(1)   | 128.44(13) | C(13)-C(12)-C(11) | 117.3(2)   |
| C(12)-C(15)     | 1.517(3)   | C(18)-O(2)-Co(1)  | 128.71(14) | C(13)-C(12)-C(15) | 122.6(2)   |
| C(16)-C(17)     | 1.424(3)   | N(1)-C(1)-C(2)    | 105.07(16) | C(11)-C(12)-C(15) | 120.1(2)   |
| C(17)-C(18)     | 1.414(3)   | N(1)-C(1)-C(6)    | 117.23(17) | C(12)-C(13)-C(8)  | 122.5(2)   |
| C(17)-C(22)     | 1.419(3)   | C(2)-C(1)-C(6)    | 110.91(19) | N(2)-C(16)-C(17)  | 124.6(2)   |
| C(18)-C(19)     | 1.426(3)   | N(2)-C(2)-C(1)    | 105.38(17) | C(18)-C(17)-C(22) | 120.2(2)   |
| C(19)-C(20)     | 1.379(3)   | N(2)-C(2)-C(3)    | 109.98(18) | C(18)-C(17)-C(16) | 121.63(19) |
| C(19)-C(23)     | 1.501(3)   | C(1)-C(2)-C(3)    | 112.02(18) | C(22)-C(17)-C(16) | 118.2(2)   |
| C(20)-C(21)     | 1.399(4)   | C(2)-C(3)-C(4)    | 111.8(2)   | O(2)-C(18)-C(17)  | 123.46(18) |
| C(21)-C(22)     | 1.358(3)   | C(5)-C(4)-C(3)    | 110.3(2)   | O(2)-C(18)-C(19)  | 118.3(2)   |
| C(21)-C(24)     | 1.525(3)   | C(6)-C(5)-C(4)    | 110.9(2)   | C(17)-C(18)-C(19) | 118.24(19) |
| O(1)-Co(1)-O(2) | 87.73(6)   | C(5)-C(6)-C(1)    | 113.46(19) | C(20)-C(19)-C(18) | 118.3(2)   |
| O(1)-Co(1)-N(2) | 170.07(8)  | N(1)-C(7)-C(8)    | 125.34(19) | C(20)-C(19)-C(23) | 121.6(2)   |
| O(2)-Co(1)-N(2) | 93.63(7)   | C(9)-C(8)-C(7)    | 121.74(18) | C(18)-C(19)-C(23) | 120.1(2)   |
| O(1)-Co(1)-N(1) | 94.04(7)   | C(9)-C(8)-C(13)   | 119.1(2)   | C(19)-C(20)-C(21) | 124.2(2)   |
| O(2)-Co(1)-N(1) | 171.76(7)  | C(7)-C(8)-C(13)   | 119.1(2)   | C(22)-C(21)-C(20) | 117.5(2)   |
| N(2)-Co(1)-N(1) | 86.01(7)   | O(1)-C(9)-C(8)    | 123.3(2)   | C(22)-C(21)-C(24) | 122.3(3)   |
| C(7)-N(1)-C(1)  | 120.57(17) | O(1)-C(9)-C(10)   | 118.34(19) | C(20)-C(21)-C(24) | 120.2(2)   |
| C(7)-N(1)-Co(1) | 126.83(15) | C(8)-C(9)-C(10)   | 118.33(19) | C(21)-C(22)-C(17) | 121.6(2)   |
| C(1)-N(1)-Co(1) | 112.44(12) | C(11)-C(10)-C(9)  | 119.5(2)   |                   |            |
| C(16)-N(2)-C(2) | 118.68(18) | C(11)-C(10)-C(14) | 121.7(2)   |                   |            |
